# Supplementary material for: Functional mesoporous carbon-coated CNT network for high-performance supercapacitors
Source: Royal Society of Chemistry journal article supplement (doi:10.1039/c3nj00159h), 2013-01-01
Supplement: c3nj00159h.pdf [file c3nj00159h.pdf]

# Supporting Information

## Functional mesoporous carbon coated CNTs network for high performance supercapacitors

*Tao Tao, Ling Zhang\*, Jiang Hao, Chunzhong Li\**

Key Laboratory for Ultrafine Materials of Ministry of Education, School of Materials Science and  
Engineering, East China University of Science and Technology, Shanghai 200237, China.

\*To whom correspondence should be addressed. E-mail address: [zlingzi@ecust.edu.cn](mailto:zlingzi@ecust.edu.cn);  
[czli@ecust.edu.cn](mailto:czli@ecust.edu.cn).

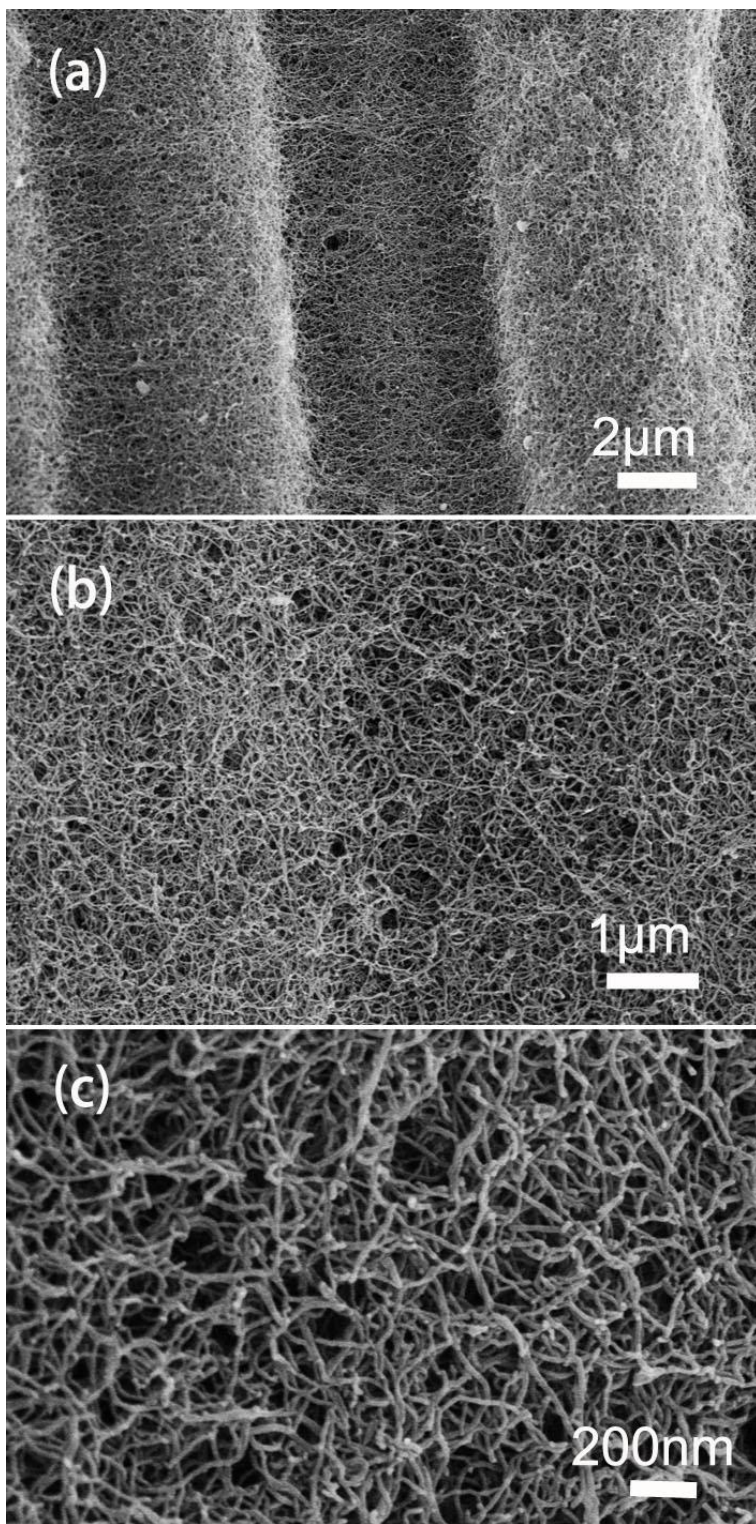

Fig. S1 SEM images of CNT/AC networks.

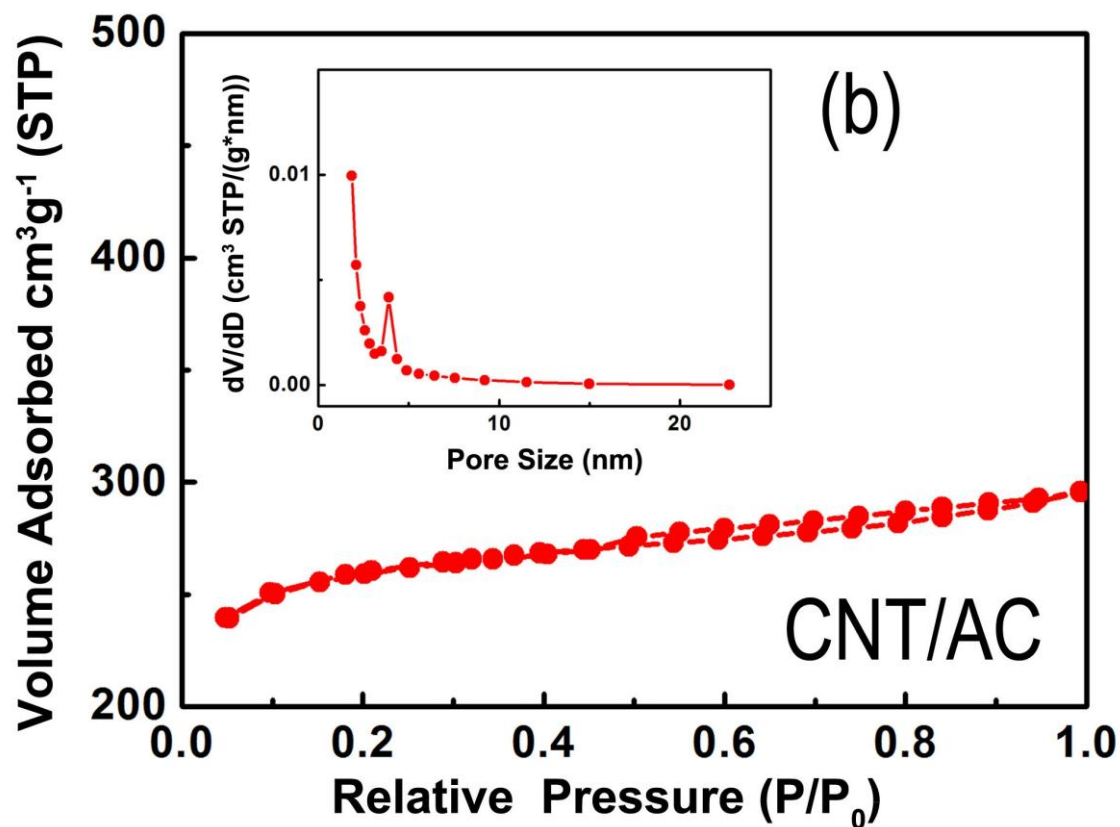

Fig. S2 Nitrogen adsorption and desorption isotherms and their corresponding pore-size distribution curves (insets) CNT/AC networks.

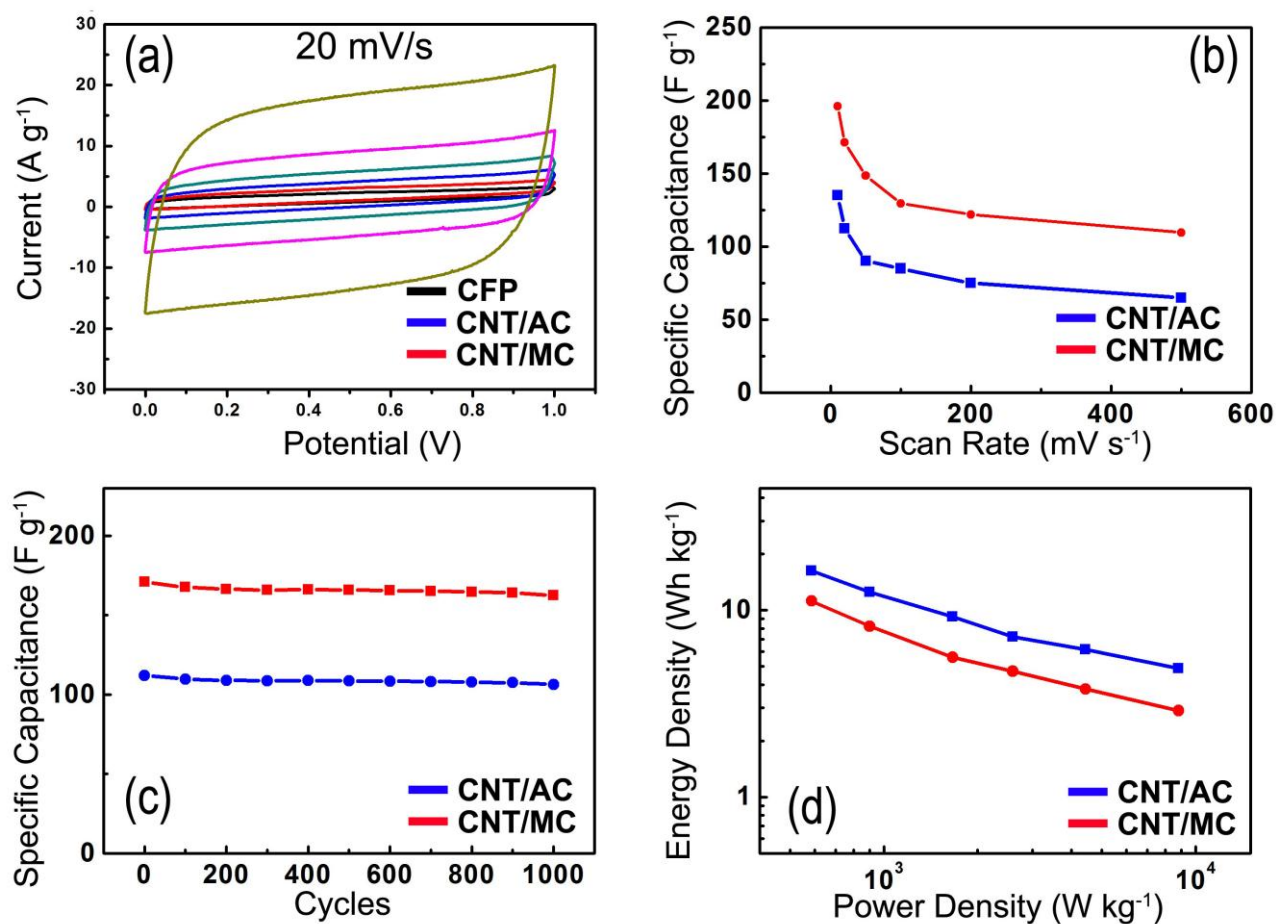

Fig.S3 Electrochemical performance of CNT/MC and CNT/AC networks in 1M H<sub>2</sub>SO<sub>4</sub>: (a) CV curves of the CNT/MC networks at various scan rates from 10 to 500 mV s<sup>-1</sup>; (b) relationship of the specific capacitance with scan rate of CV measurements; (c) Variation of specific capacitance with cycle number at a scan rate of 20 mV s<sup>-1</sup> (d) Ragone plots.

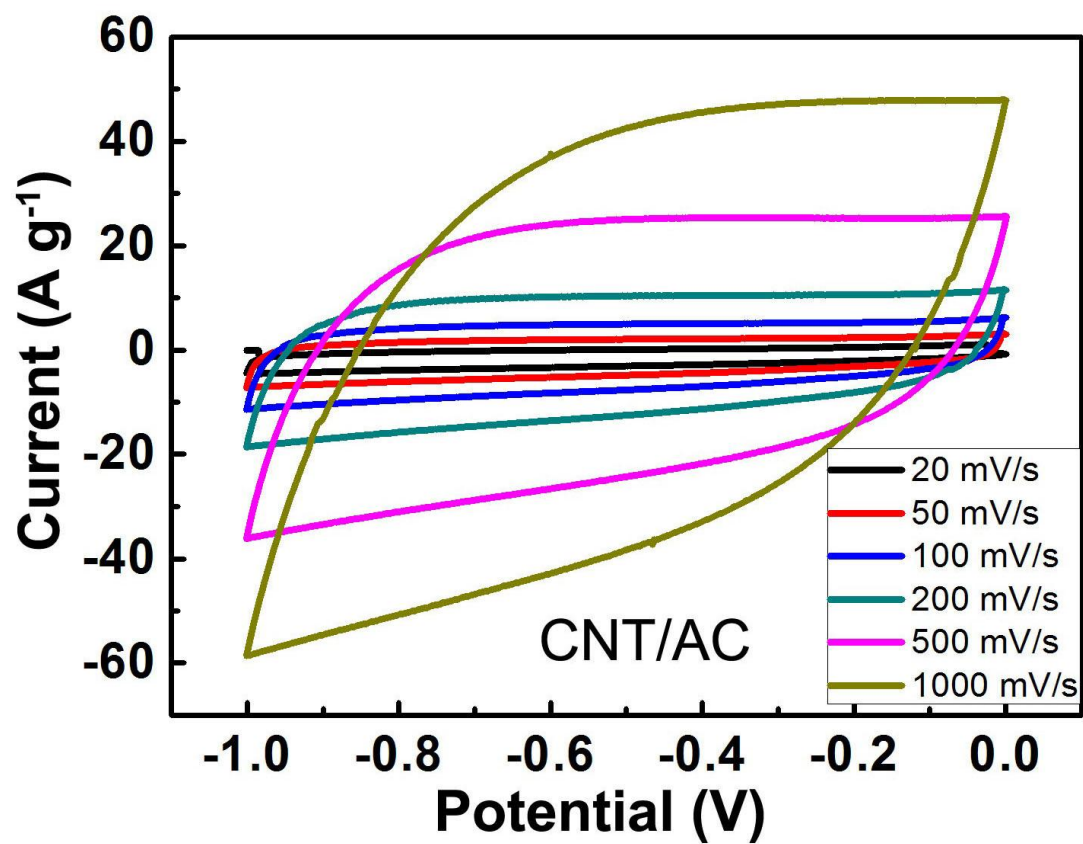

Fig. S4 CV curves of the CNT/AC networks at various scan rates from 20 to 1000  $\text{mV s}^{-1}$  in 1M KOH.
